# Supplementary material
Source: publisher site journal article supplement (https://www.dovepress.com/article/294440)
Supplement: Supplementary file 1 [file get_supplementary_file.php]

**Supplementary Material**

| **Supplementary Figure S1:** Flow diagram. | **p. 2** |
| --- | --- |
| **Supplementary Figure S2:** Cumulative incidence of primary outcomes (entire cohort) | **p. 4** |
|  |  |
|  |  |
|  |  |



**Supplementary Figure S1: Flow diagram.** A total of 920 advanced HCC patients were identified and 366 patients were excluded. A total of 554 patients were classified into two groups according to first-line treatment (the sorafenib-first group and the TACE-first group). After propensity score matching, 170 patients were analysed for the outcomes.

Abbreviations: COPD, chronic obstructive pulmonary disease; ESRD, end-stage renal disease; HCC, hepatocellular carcinoma; TACE, transarterial chemoembolization; TKI, tyrosine kinase inhibitor.





**Supplementary Figure S2: Cumulative incidence of primary outcomes (entire cohort)** (A) Overall survival. (B) Time to progression. Survival curves were compared using the log-rank test. Time to progression was evaluated only in patients with follow-up images.

Abbreviations: CI, confidence interval; HR, hazard ratio; TACE, transarterial chemoembolization.
